# Supplementary material
Source: Springer Nature journal article supplement (https://www.springermedizin.de/resource/supplementary/12943_2009_547_MOESM1_ESM.pdf/9554942)

**K K-EBV KE LE LCL**

**EBER1**

**U6**

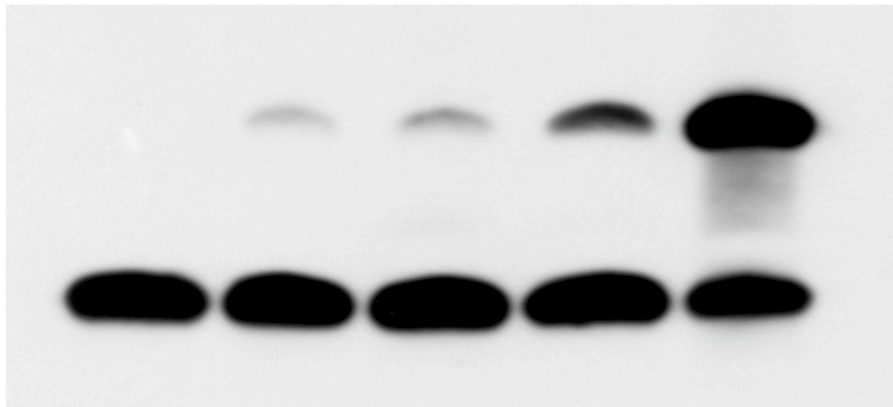

Supplement: MOESM1 [file 9554942]
